# Supplementary material for: Developing a machine learning algorithm to predict probability of retear and functional outcomes in patients undergoing rotator cuff repair surgery: protocol for a retrospective, multicentre study
Source: PubMed Central journal article supplement — BMJ Open. 2023 Feb 10;13(2):e063673. doi: 10.1136/bmjopen-2022-063673 (PMC9923257; doi:10.1136/bmjopen-2022-063673), 2023-02-10
Supplement: bmjopen-2022-063673supp001.pdf [file bmjopen-2022-063673supp001.pdf]

#1 subject

Rotator cuff tear/ injury

**(rotator[tiab] AND cuff[tiab] AND injur\*[tiab])**

**OR**

**(rotator[tiab] AND cuff[tiab] AND tear\*[tiab])**

**OR**

**(rotator[tiab] AND cuff[tiab] AND repair\*[tiab])**

**OR**

**(rotator[tiab] AND cuff[tiab] AND surg\*[tiab])**

**OR**

**"Rotator Cuff Injuries"[Mesh]**

#2.1 Intervention (RCT)

Repair

#2.2 Intervention (Cohort)

Repair

#3 Outcome

Retear rate measured by MRI ultrasound or arthro CT

**(Retear[tiab] OR (re-tear)[tiab] OR healing[tiab])**

**OR**

**("Magnetic Resonance Imaging"[Mesh] OR "MRI" OR "magnetic resonance")**

**OR**

**ultraso\*[tiab] OR "Ultrasonography"[Mesh]**

**OR**

**"Arthrography"[Mesh] OR arthrography[tiab])**

Search: **((Retear[tiab] OR re-tear[tiab] OR healing[tiab]) OR ("Magnetic Resonance Imaging"[Mesh] OR "MRI" OR "magnetic resonance" OR ultraso\*[tiab] OR "Ultrasonography"[Mesh] OR "Arthrography"[Mesh] OR arthrography[tiab])) AND ((rotator[tiab] AND cuff[tiab] AND injur\*[tiab]) OR (rotator[tiab] AND cuff[tiab] AND tear\*[tiab]) OR (rotator[tiab] AND cuff[tiab] AND repair\*[tiab]) OR (rotator[tiab] AND cuff[tiab] AND surg\*[tiab]) OR "Rotator Cuff Injuries"[Mesh])** Filters: **Clinical Trial, Randomized Controlled Trial** Sort by: **Most Recent**
